# Supplementary material for: Two-dimensional hexagonal M3C2 (M = Zn, Cd and Hg) monolayers: novel quantum spin Hall insulators and Dirac cone materials
Source: Royal Society of Chemistry journal article supplement (doi:10.1039/c7tc02739g), 2017-01-01
Supplement: c7tc02739g1.pdf [file c7tc02739g1.pdf]

## Electronic Supplementary Information

# Two-dimensional Hexagonal $M_3C_2$ ( $M = Zn, Cd, Hg$ ) Monolayer: Novel Quantum Spin Hall Insulators and Dirac Cone Materials

Peng-Fei Liu,<sup>a,c,d</sup> Liujiang Zhou,<sup>\*b</sup> Sergei Tretiak,<sup>b</sup> Li-Ming Wu<sup>\*,a</sup>

<sup>a</sup>State Key Laboratory of Structural Chemistry, Fujian Institute of Research on the Structure of Matter, Chinese Academy of Sciences, Fuzhou, Fujian 350002, People's Republic of China.

<sup>b</sup>Theoretical Division, Center for Nonlinear Studies and Center for Integrated Nanotechnologies, Los Alamos National Laboratory, Los Alamos, New Mexico 87545, United States

<sup>c</sup>Institute of High Energy Physics, Chinese Academy of Sciences (CAS), Beijing 100049, China.

<sup>d</sup>Dongguan Neutron Science Center, Dongguan 523803, China.

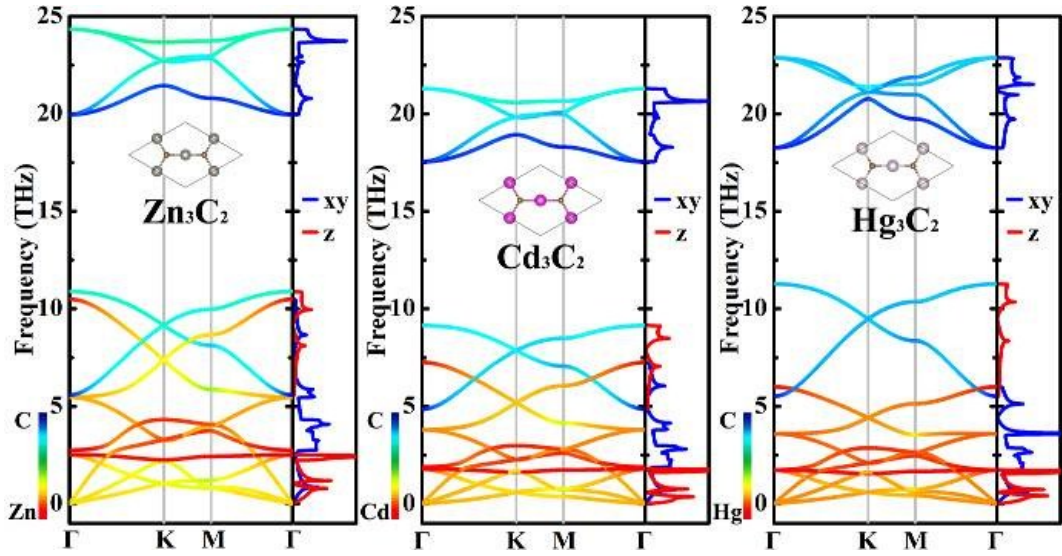

Figure S1. The orbital-resolved phonon spectra and projected phonon density of states for the  $M_3C_2$  monolayers.

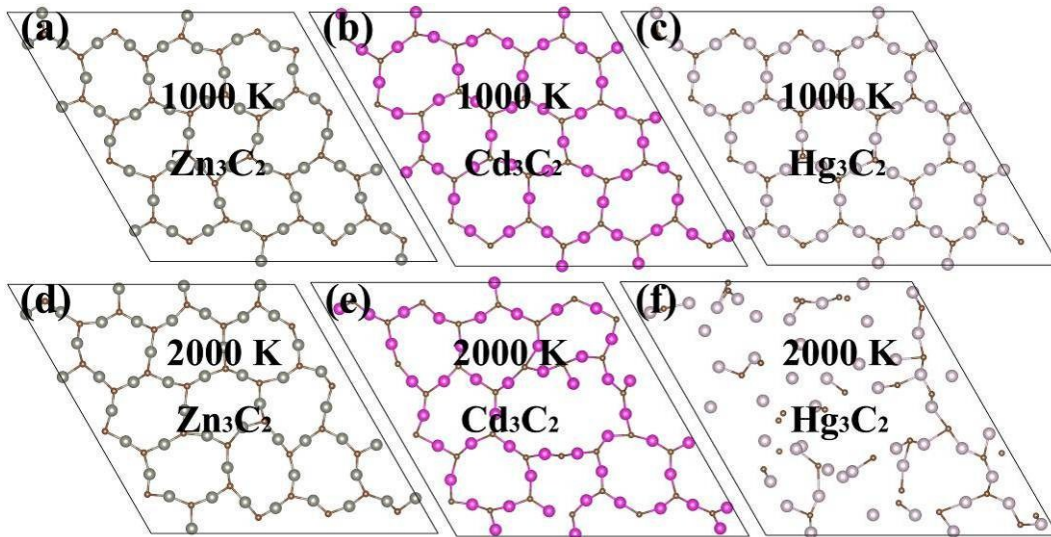

Figure S2. The top views of monolayers after the *ab-initio* molecular dynamics simulation.

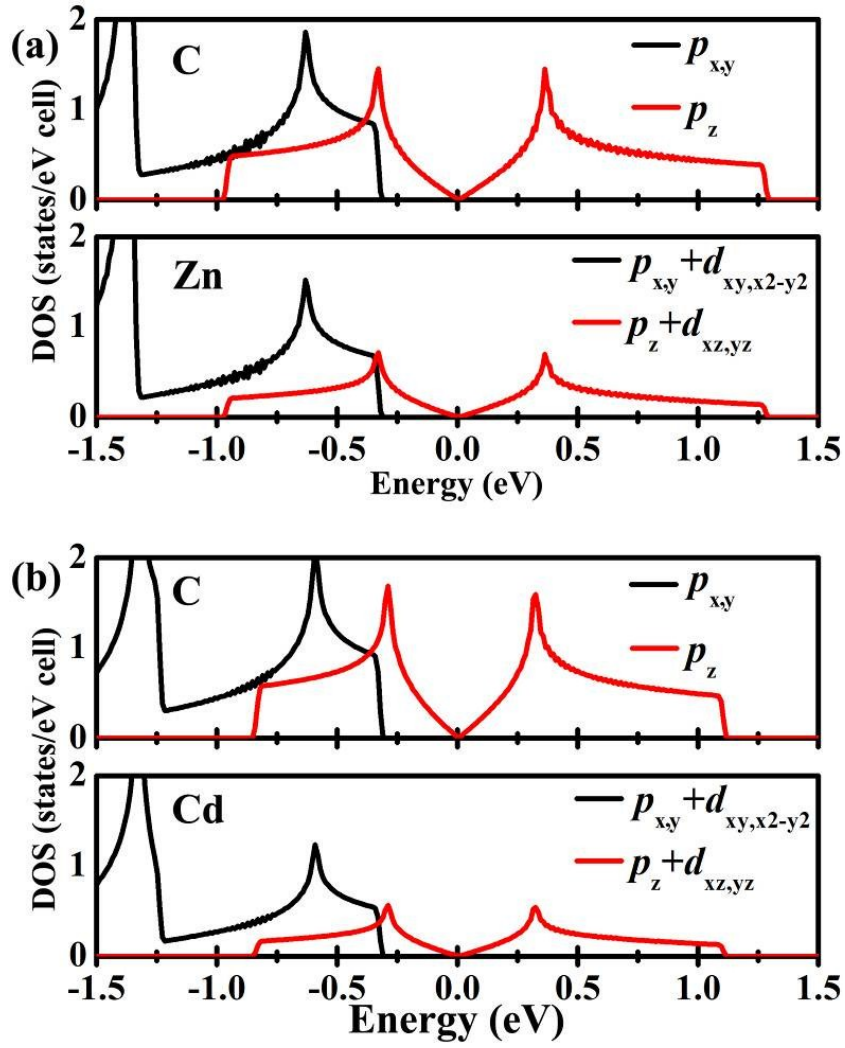

Figure S3. The density of states for the  $\text{Zn}_3\text{C}_2$  and  $\text{Cd}_3\text{C}_2$  monolayers.

| Comp.                   | Parities of occupied spin-degenerate bands | Product      |
|-------------------------|--------------------------------------------|--------------|
| $\text{Zn}_3\text{C}_2$ | + - + + + + + + + + + + + + + - - -        | $\Gamma (+)$ |
|                         | - + - - - + + - - + - - + - - + - - + +    | $M (-)$      |
| $\text{Cd}_3\text{C}_2$ | + + - + + + + + + + + + + + + - - -        | $\Gamma (+)$ |
|                         | - + - - + - + - - + - - + - - + - - + +    | $M (-)$      |
| $\text{Hg}_3\text{C}_2$ | + - + + + + + + + + + + + + + - - -        | $\Gamma (+)$ |
|                         | - + - - + + - - - + + - - + - - + - - + +  | $M (-)$      |

Figure S4. The parities of occupied bands at  $\Gamma$  (red color) and  $M$  (black color) points for the  $\text{M}_3\text{C}_2$  monolayers. The product of  $\Gamma$  and  $M$  points are + 1 and - 1 for  $\text{M}_3\text{C}_2$  monolayers.

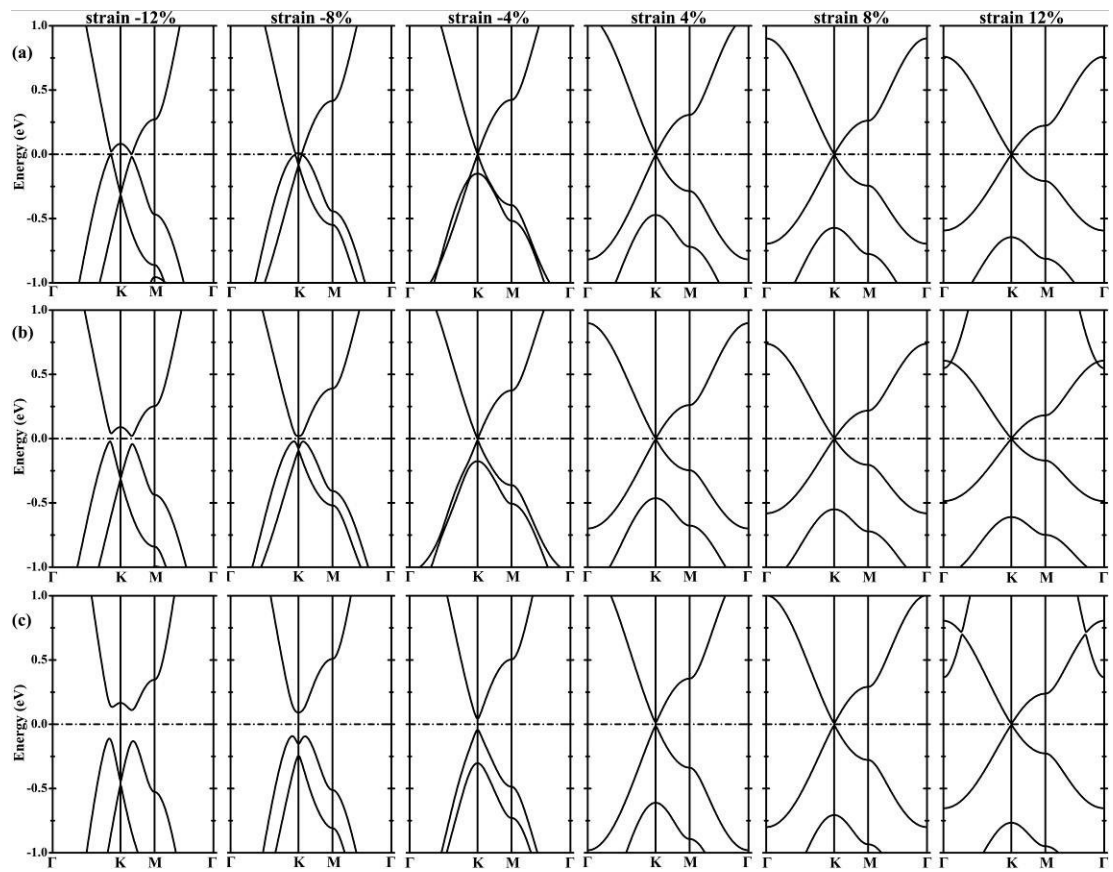

**Figure S5.** The calculated band structures of (a)  $\text{Zn}_3\text{C}_2$  (b)  $\text{Cd}_3\text{C}_2$  and (c)  $\text{Hg}_3\text{C}_2$  monolayers with SOC under external strain from  $-12\%$  to  $12\%$ . The Fermi level is set to zero.

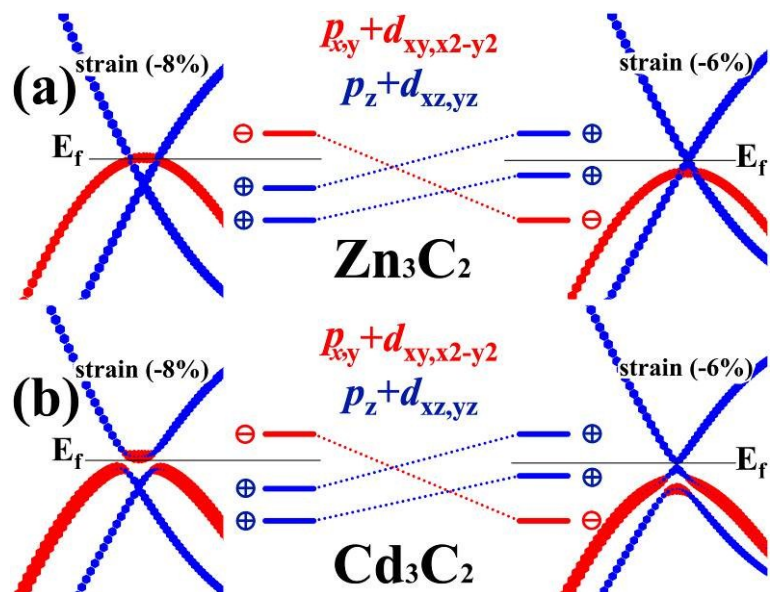

**Figure S6.** Schematic illustration of the band evolution around the Fermi level at K point for the (a)  $\text{Zn}_3\text{C}_2$  and (b)  $\text{Cd}_3\text{C}_2$  monolayers.

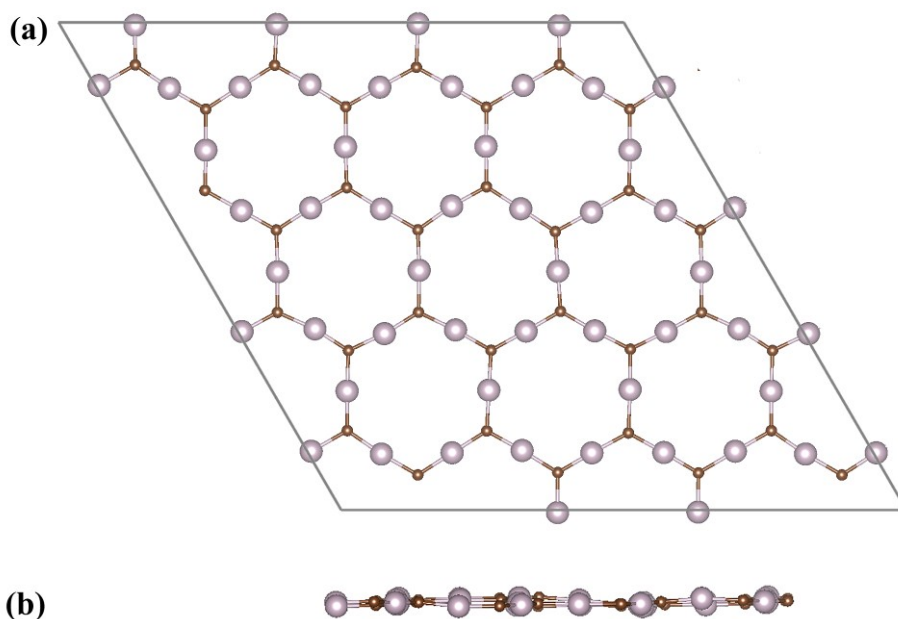

**Figure S7.** (a) Top and (b) side view of a snapshot of the  $\text{Hg}_3\text{C}_2$  sheet under 6% in-plane biaxial tensile strain at 5 ps of *ab-initio* molecular dynamics simulation in the NVT ensemble. The controlled temperature of the system was set to 300K.

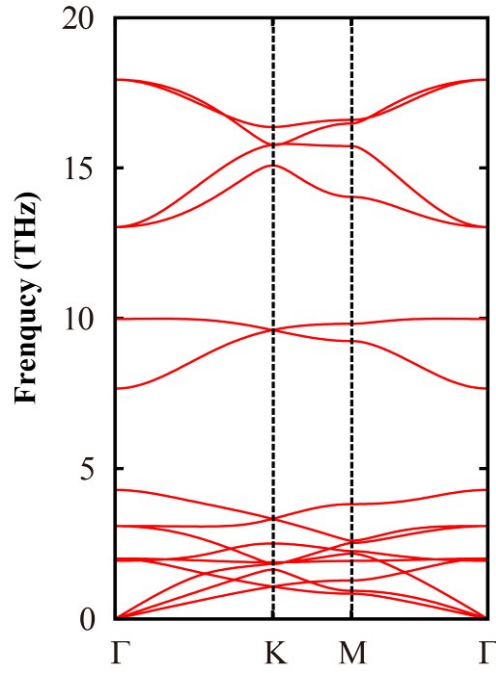

**Figure S8.** The phonon spectrum of  $\text{Hg}_3\text{C}_2$  monolayer under 6% in-plane biaxial tensile strain.

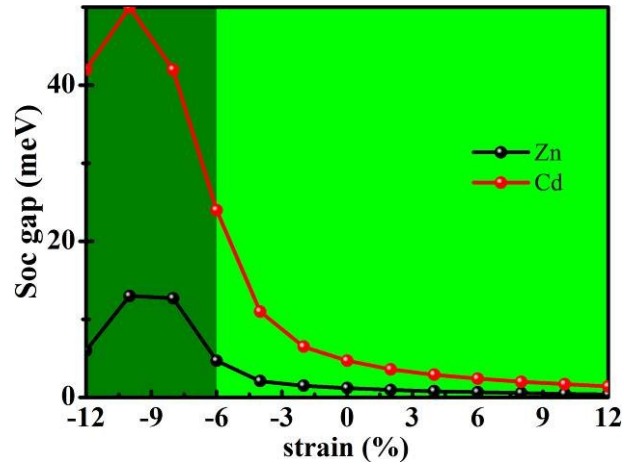

**Figure S9.** The nontrivial topological gap of the  $\text{Zn}_3\text{C}_2$  and  $\text{Cd}_3\text{C}_2$  monolayers as a function of applied external biaxial strain obtained with PBE+SOC technique. Olive region: node-line semimetal phase; green region: single Dirac-point phase.
